# Supplementary material for: Age Estimate of GJB2-p.(Arg143Trp) Founder Variant in Hearing Impairment in Ghana, Suggests Multiple Independent Origins across Populations
Source: MDPI journal article supplement (doi:10.3390/biology11030476), 2022-03-21
Supplement: s1 [file s1]

## Supplementary Materials

**Table S1.** Quality metrics of markers selected for age estimation and haplotype analysis

| Marker             | Chr: Pos    | MQ     | DP    | AvGQ  | VQSLOD | FILTER | BIOTYPE  |
|--------------------|-------------|--------|-------|-------|--------|--------|----------|
| <b>rs115802719</b> | 13:20635310 | 249.92 | 9622  | 89.78 | 7.35   | PASS   | Exonic   |
| <b>rs7324021</b>   | 13:20637140 | 250    | 7530  | 78.15 | 4.98   | PASS   | Intronic |
| <b>rs17075877</b>  | 13:20641422 | 248.84 | 9149  | 85.73 | 5.72   | PASS   | Exonic   |
| <b>*rs80338948</b> | 13:20763294 | 249.37 | 13226 | 88.56 | 5.1    | PASS   | Exonic   |
| <b>rs9578260</b>   | 13:20763754 | 249.44 | 17623 | 79.17 | 6.77   | PASS   | Intronic |

Chr:Pos=Chromosome and base pair position; MQ=Mapping quality; DP=Depth of coverage; AvGQ=Average genotype quality; VQSLOD=Variant quality score log of the odds; \* = Disease allele

**Table S2.** Quality metrics of imputed SNVs markers and accuracy scale

| Marker             | Chr:Pos     | Ref/Alt | Gene        | Bio-type | LD (r <sup>2</sup> ) | Genetic Map (cM) | MAF (1KGP3 AFR populations) | Imputation accuracy (scale: 0 - 1) |
|--------------------|-------------|---------|-------------|----------|----------------------|------------------|-----------------------------|------------------------------------|
| <b>rs7329857</b>   | 13:20762929 | G/A     | <i>GJB2</i> | 3'UTR    | 0.38                 | 0.000000         | A = 0.2196                  | 0.85                               |
| <b>rs7337074</b>   | 13:20762936 | T/A     | <i>GJB2</i> | 3'UTR    | 0.38                 | 0.000007         | A = 0.0002                  | 0.85                               |
| <b>*rs80338948</b> | 13:20763294 | G/A     | <i>GJB2</i> | Exonic   | 1.000                | 0.000365         | A = 0.0002                  | 1                                  |
| <b>rs9578260</b>   | 13:20763754 | G/A     | <i>GJB2</i> | Intronic | 0.38                 | 0.000825         | A = 0.0002                  | 1                                  |
| <b>rs9578261</b>   | 13:20764147 | C/A     | <i>GJB2</i> | Intronic | 0.36                 | 0.001218         | T = 0.0002                  | 0.99                               |
| <b>rs9579800</b>   | 13:20764312 | T/A     | <i>GJB2</i> | Intronic | 0.36                 | 0.001383         | A = 0.0002                  | 0.99                               |
| <b>rs74035963</b>  | 13:20764722 | A/G     | <i>GJB2</i> | Intronic | 0.36                 | 0.001793         | G = 0.0002                  | 0.99                               |
| <b>rs74035964</b>  | 13:20764815 | T/C     | <i>GJB2</i> | Intronic | 0.36                 | 0.001886         | C = 0.0002                  | 0.99                               |
| <b>rs74035965</b>  | 13:20764850 | C/T     | <i>GJB2</i> | Intronic | 0.36                 | 0.001921         | T = 0.0002                  | 0.99                               |

Computed genetic map distance in centimorgans (cM), and minor allele frequencies (MAF) in the reference 1000 Genome reference panel, phase 3, version 5 database (1KGP3v5); Computed linkage disequilibrium (r<sup>2</sup>) for each marker respectively. RSID=reference SNP ID; Chr:Pos=Chromosome and base pair position; Ref/Alt=Reference and alternate alleles; LD=linkage disequilibrium; cM=Centimorgan; AAF=alternate allele frequency; \* = the disease mutation

**Table S3.** Haplotypes and haplotype frequencies in Ghanaian p.R143W-positive and p.R143W-negative populations based on five markers that were in linkage disequilibrium with p.R143W.

| Marker and Ref/Alt allele |           |           |            |           | Hap   | Hap Name | Frequency |         |         |
|---------------------------|-----------|-----------|------------|-----------|-------|----------|-----------|---------|---------|
| rs11580271                | rs7324021 | rs1705877 | rs80338948 | rs9578260 | -     | -        | GH A-38   | R143W-1 | R143W-2 |
| 9                         |           |           |            |           |       |          |           |         |         |
| A/G                       | T/G       | A/G       | G/A        | G/A       | -     | -        |           |         |         |
| 0                         | 0         | 0         | 0          | 0         | 00000 | Hap1     | 0.57      | 0       | 0       |
| 0                         | 0         | 0         | 0          | 1         | 00001 | Hap2     | 0.26      | 0       | 0       |
| 0                         | 0         | 0         | 1          | 0         | 00010 | Hap3     | 0         | 0.067   | 0.067   |
| 0                         | 0         | 0         | 1          | 1         | 00011 | Hap4     | 0         | 0.333   | 0.33    |
| 0                         | 0         | 1         | 0          | 1         | 00101 | Hap5     | 0.026     |         | 0       |
| 0                         | 0         | 1         | 1          | 1         | 00111 | Hap6     | 0         | 0.067   | 0.067   |
| 0                         | 1         | 0         | 0          | 0         | 01000 | Hap7     | 0.079     | 0       | 0       |
| 0                         | 1         | 0         | 0          | 1         | 01001 | Hap8     | 0.026     | 0       | 0       |
| 0                         | 1         | 0         | 1          | 0         | 01010 | Hap9     | 0         | 0.033   | 0       |
| 0                         | 1         | 0         | 1          | 1         | 01011 | Hap10    | 0         | 0.3     | 0.33    |
| 1                         | 0         | 1         | 0          | 0         | 10100 | Hap11    | 0.026     | 0       | 0       |
| 1                         | 0         | 1         | 0          | 1         | 10101 | Hap12    | 0.013     | 0       | 0       |
| 1                         | 0         | 1         | 1          | 1         | 10111 | Hap13    | 0         | 0.2     | 0.2     |

The “0s” and “1s” against each marker indicate whether the marker is homozygous for the reference allele (0) or homozygous for the alternate allele (1). Ref/Alt=Reference and alternate alleles; Hap = Haplotype.

**Table S4.** Excel 1KGP3v5 WES haplotype frequencies and diversity (excel spreadsheet attached).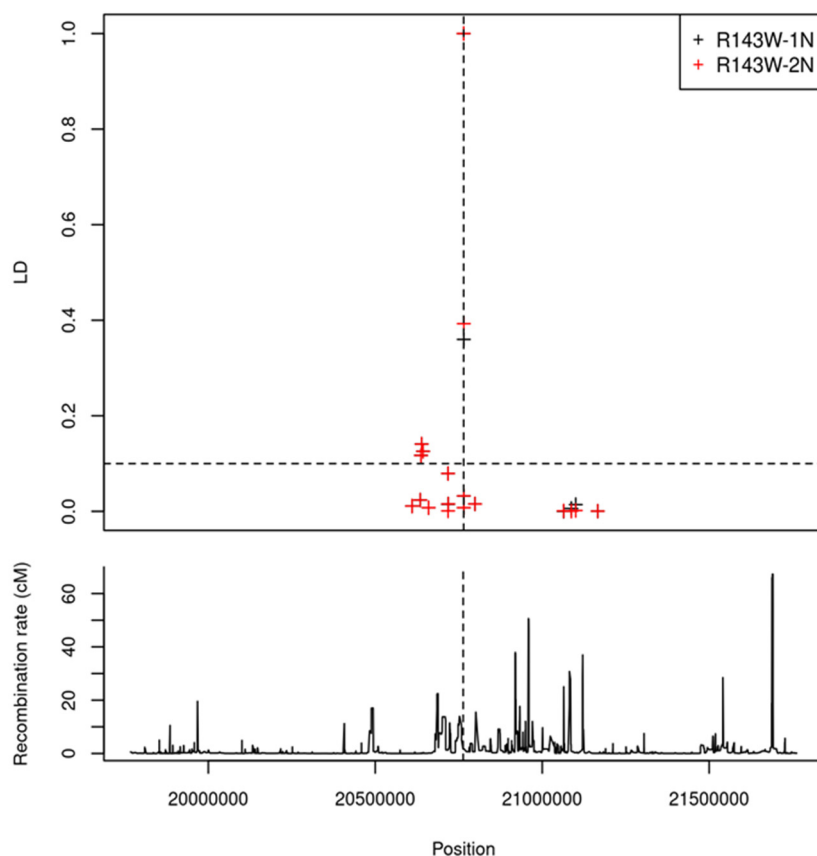**Figure S1:** Pattern of linkage disequilibrium and recombination in the 2 Mb region around p.R143W.

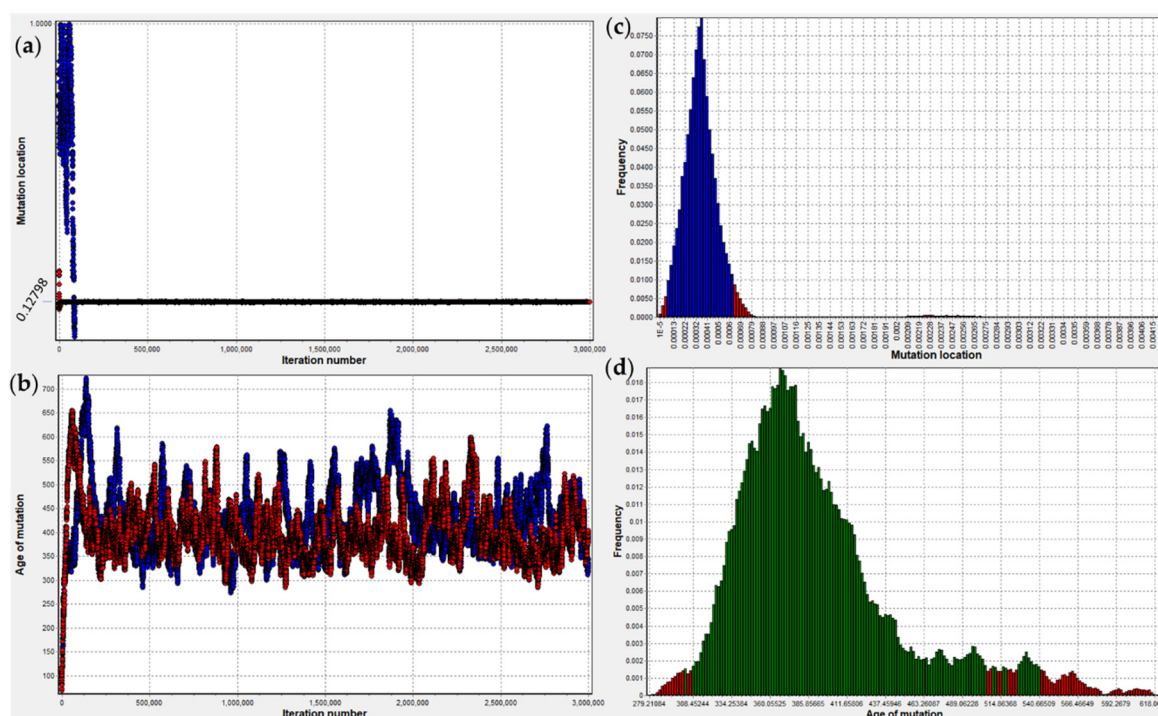

**Figure S2:** Estimation of p.(Arg143Trp) location and age for the unimputed data set ((a) and (b)) and the imputed data set ((c) and (d)). The two chains converged at the correct mutation location ((a) and (c)) while estimating the allele age ((b) and (d)). In the unimputed set (b), Chain 2 stably estimated the allele age and this was apparent by its more precise estimation of the allele location from the very beginning of the burnin iterations (a).

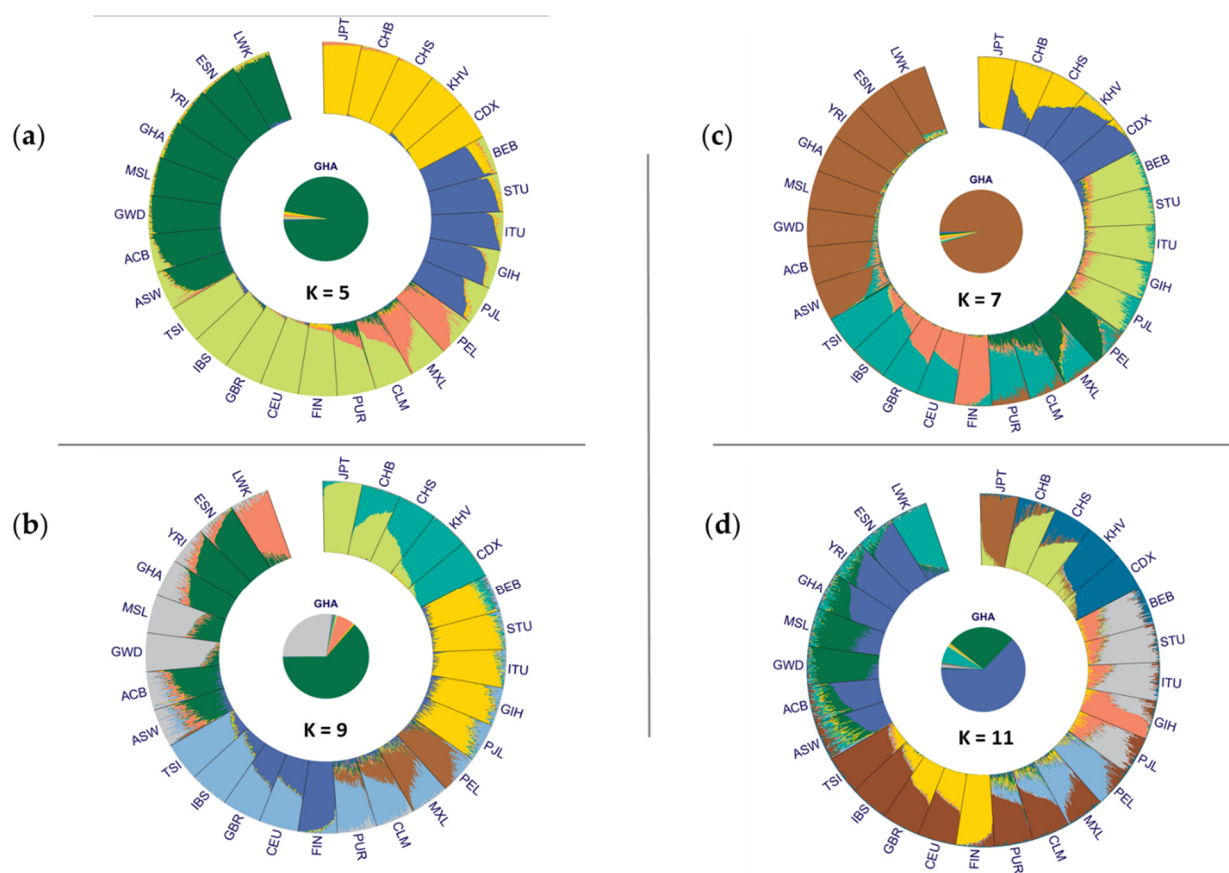

**Figure S3:** Ancestry analysis for Ghana and 1000 Genomes populations. At  $k = 5$ , all continental populations are resolved. European, American, as well as East Asian populations are further resolved at  $k = 7$ . From  $K = 8$  to  $k = 11$ , all the continental ancestries are further resolved into sub-populations reflecting geographic separation. For instance, the LWK population in East Africa is clearly distinguished from all other African populations which are all from West Africa.
